# Supplementary material
Source: PubMed Central journal article supplement (PMC1413829)
Supplement: pnas_0511119103_2.pdf [file pnas_0511119103_2.pdf]

**Table 3. Fucosyltransferase genotypes in isolates from patient II**

| Isolate            | <i>futA</i> (HP0379) |                      | <i>futB</i> (HP0651) |         | <i>futC</i> (HP0093-94) |
|--------------------|----------------------|----------------------|----------------------|---------|-------------------------|
|                    | C-tract*             | Heptads <sup>†</sup> | C-tract              | Heptads | C-tract                 |
| <i>1990 Antrum</i> |                      |                      |                      |         |                         |
| II-90A:1           | 9 (off)              | 6                    | 10 (on)              | 6       | ND <sup>‡</sup>         |
| II-90A:2           | 9 (off)              | 6                    | 10 (on)              | 6       | ND                      |
| II-90A:3           | 9 (off)              | 6                    | 10 (on)              | 6       | ND                      |
| II-90A:4           | 9 (off)              | 6                    | 10 (on)              | 6       | ND                      |
| II-90A:5           | 9 (off)              | 6                    | 10 (on)              | 6       | ND                      |
| II-90A:6           | 10 (on)              | 7                    | 10 (on)              | 2       | ND                      |
| II-90A:7           | 9 (off)              | 6                    | 10 (on)              | 6       | ND                      |
| II-90A:8           | 9 (off)              | 6                    | 10 (on)              | 6       | ND                      |
| II-90A:9           | 10 (on)              | 7                    | 9 (off)              | 2       | ND                      |
| II-90A:10          | 9 (off)              | 6                    | 10 (on)              | 6       | ND                      |
| <i>1999 Antrum</i> |                      |                      |                      |         |                         |
| II-99A:1           | 10 (on)              | 8                    | 9 (off)              | 2       | ND                      |
| II-99A:2           | 10 (on)              | 8                    | 9 (off)              | 2       | ND                      |
| II-99A:3           | 10 (on)              | 8                    | 9 (off)              | 2       | ND                      |
| II-99A:4           | 9 (off)              | 6                    | 10 (on)              | 7       | ND                      |
| II-99A:5           | 10 (on)              | 7                    | 11 (off)             | 2       | ND                      |
| II-99A:6           | 10 (on)              | 7                    | 11 (off)             | 2       | ND                      |
| II-99A:7           | 10 (on)              | 8                    | 9 (off)              | 2       | ND                      |
| II-99A:8           | 10 (on)              | 8                    | 9 (off)              | 2       | ND                      |
| II-99A:9           | 10 (on)              | 8                    | 9 (off)              | 2       | ND                      |
| II-99A:10          | 10 (on)              | 7                    | 11 (off)             | 2       | ND                      |
| <i>1999 Corpus</i> |                      |                      |                      |         |                         |
| II-99C:1           | 9 (off)              | 6                    | 9 (off)              | 2       | ND                      |
| II-99C:2           | 9 (off)              | 6                    | 9 (off)              | 2       | ND                      |
| II-99C:3           | 10 (on)              | 7                    | 9 (off)              | 2       | ND                      |
| II-99C:4           | 9 (off)              | 6                    | 9 (off)              | 2       | ND                      |
| II-99C:5           | 9 (off)              | 6                    | 9 (off)              | 2       | ND                      |
| II-99C:6           | 9 (off)              | 6                    | 9 (off)              | 2       | ND                      |
| II-99C:7           | 9 (off)              | 6                    | 9 (off)              | 2       | ND                      |

| Isolate   | <i>futA</i> (HP0379) |                      | <i>futB</i> (HP0651) |         | <i>futC</i> (HP0093-94) |
|-----------|----------------------|----------------------|----------------------|---------|-------------------------|
|           | C-tract*             | Heptads <sup>†</sup> | C-tract              | Heptads | C-tract                 |
| II-99C:8  | 9 (off)              | 6                    | 9 (off)              | 2       | ND                      |
| II-99C:9  | 9 (off)              | 6                    | 9 (off)              | 2       | ND                      |
| II-99C:10 | 9 (off)              | 6                    | 9 (off)              | 2       | ND                      |

\*Length of poly-C tract and on/off status (in-frame/out-of-frame).

<sup>†</sup>Number of heptads as defined by PCR amplification of the C-terminal region of the gene and sequencing of at least two fragments of each size per gene and patient.

<sup>‡</sup>Not determined, because consisted of 13 to 16 C residues that could not be accurately sequenced.
